# Supplementary material for: Identification of Interacting Stromal Axes in Triple-Negative Breast Cancer
Source: Oxford University Press journal article supplement (doi:10.1158/0008-5472.can-16-3427), 2017-06-26
Supplement: 00085472can163427-sup-176164_2_supp_4092729_xrkmfx.xlsx [file 00085472can163427-sup-176164_2_supp_4092729_xrkmfx.xlsx]

## Sheet: Supplemental table 1
Subtype assigned by webtool	ROI_95 Assignment Score for matching subtype
	Low	Intermediate	High
BL1	0	0	161
BL2	0	3	84
IM	0	0	184
LAR	0	0	76
MSL	1	0	61
M	0	0	172
Supplemental Table 1: TNBCType calls match between ROI95 and the online webtool
Level of TNBCType subtype as called by ROI95 for patients called positive for that subtype by the online tool.

## Sheet: Supplemental table 2
No. Patients	57
Number of samples
Tumor Stroma Samples	57
Normal Stroma Samples	11
Size
<= 20mm	24
> 20mm	33
mean (mm)	25.17
Standard deviation	13.56
Grade
Grade 1	0
Grade 2	5
Grade 3	51
Unknown	1
Lymph node status
Positive	18
Negative	29
Unknown	10
Age
<= 55	27
> 55	30
Age: mean in years (range)	58.63 (33 - 91)
Outcome
Total relapse	16
Total relapse free	38
Unknown relapse information	3
Total follow up: mean in months (range)	67.30 (0.0 - 172.2)
Chemotherapy
Patients receiving adjuvant chemotherpy	35
Patients NOT receiving adjuvant chemotherapy	8
Unknown	14
Supplemental Table 2: Summary of patient characteristics for LCM cohort

## Sheet: Supplemental table 3
B-cells			Invasive Epithelial Cells			T-cells			Desmoplastic stroma (D)
Gene	log2 Fold Change	FDR Adjust p-value	Gene	log2 Fold Change	FDR Adjust p-value	Gene	log2 Fold Change	FDR Adjust p-value	Gene	log2 Fold Change	FDR Adjust p-value
IGLL5	3.10954	4.85e-13	MIA	2.32005	5.2e-05	CXCL9	2.13952	5.87e-05	CXCL14	1.96495	0.00159426
ENST00000390323	3.00918	9.51e-12	SERPINA3	2.28701	0.0203064	UBD	1.96943	5.61e-08	COMP	1.82754	7.25e-05
S77011	2.68106	2.23e-13	KRT6B	2.1515	0.0477291	NKG7	1.89202	5.77e-09	COL10A1	1.40977	0.00128376
lincRNA:chr1:41956288-41971088_R	2.60918	1.27e-13	KRT23	2.10418	0.0251045	CCL18	1.86515	6.83e-05	CILP	1.32026	0.0229131
ENST00000390237	2.50043	2.73e-07	SAA1	1.68143	0.00498495	GNLY	1.86095	1.33e-07	F13A1	1.30613	0.00785383
ENST00000390549	2.27651	6.43e-07	LAMC2	1.48805	0.0399111	ZNF683	1.78697	8.38e-07	MFAP4	1.28454	0.000909989
BF175071	2.26851	3.93e-11	ROPN1	1.48391	0.0163037	HLA-DQA1	1.75764	0.00547543	FBLN1	1.24832	0.00106144
ENST00000390559	2.26266	1.71e-06	MT1G	1.35971	0.0399111	IDO1	1.67927	2.22e-07	DCN	1.2221	0.000454777
TNRC18	2.09783	5.8e-12	CBS	1.29506	5.2e-05	GBP5	1.66469	7.37e-08	COL12A1	1.1971	0.000467466
ENST00000390551	1.99679	6.45e-06	lincRNA:chr1:205404014-205407007_R	1.25358	6.07e-06	GZMA	1.65474	8.77e-10	WISP2	1.19605	0.015607
lincRNA:chr1:228258277-228268427_F	1.97623	2.23e-13	IGF2BP3	1.08027	0.034735	CD2	1.57471	1.13e-09	KANK4	1.16353	0.0468333
ENST00000390547	1.93176	0.00114498	MT1E	1.04098	0.0218049	GZMH	1.54033	1.25e-05	COL8A2	1.13993	7.65e-07
lincRNA:chr2:91677073-91695823_R	1.92037	3.33e-11	MT1F	0.990579	0.00498495	CXCR3	1.43483	2.72e-10	NKD2	1.1361	0.0217823
IGLL1	1.70398	3.33e-11	MT1M	0.903659	0.0258705	ICOS	1.42363	6.33e-06	ITGA11	1.12621	0.000266049
lincRNA:chr10:6779694-6889494_R	1.63511	4.85e-13	MT1L	0.833901	0.0218049	CD3D	1.42121	1.05e-10	COL8A1	1.11784	0.000273848
LOC100653210	1.60194	5.19e-10	MT1H	0.805296	0.0108682	CCL19	1.39804	0.0139903	ADRA2A	1.10737	0.00262829
LOC96610	1.60112	4.63e-08	MT1B	0.78395	0.0203064	SIRPG	1.3816	1.6e-09	lincRNA:chr3:112308735-112318605_R	1.08539	0.00466471
POU2AF1	1.55708	2.94e-11	MT1A	0.696983	0.0218049	KLHDC7B	1.35518	0.000539038	TIMP3	1.08386	7.27e-05
ENST00000390305	1.53598	6.54e-07	FRMD3	0.615819	0.0108682	CCR5	1.3223	2.17e-11	SSC5D	1.07846	0.00362172
IGJ	1.51956	7.32e-08	PTX3	0.55047	0.0258705	CD52	1.31464	4.57e-09	HTRA1	1.07628	0.000266049
KIAA0125	1.51227	1.18e-06	C11orf9	0.517275	0.0218049	GZMK	1.30806	5.61e-08	CDH11	1.06693	2.38e-05
CD79A	1.49149	1.83e-12	NDUFA5	-0.253579	0.0399111	GPR171	1.30666	2.62e-07	lincRNA:chr3:112315643-112316945_R	1.05778	0.00319057
ENST00000390312	1.48944	2.25e-08	WAPAL	-0.285653	0.00498495	PVRIG	1.29128	2e-09	LUM	1.02542	0.000218907
ENST00000453166	1.46506	3.26e-06	CTNND1	-0.309457	0.0218049	MARCO	1.28932	0.0130114	C1orf151-NBL1	1.02096	8.88e-05
A_33_P3303394	1.46247	3.28e-07	LRBA	-0.362928	0.00498495	LAMP3	1.27411	1.19e-05	MFAP5	1.00613	0.0147132
FCRL5	1.43214	5.8e-12	NDUFAF1	-0.363761	0.0223449	CCR7	1.26984	1.73e-05	OGN	0.989122	0.00296525
ENST00000354689	1.41477	1.66e-07	C12orf29	-0.460321	0.037461	IL18RAP	1.24435	5.83e-07	DACT3	0.978607	0.000190629
ENST00000426099	1.38882	2.23e-08				GZMB	1.24354	1.25e-06	SYNDIG1	0.972904	0.000895093
DQ098707	1.35057	6.67e-08				CD8A	1.23654	7.46e-10	THBS2	0.968477	0.000569621
FAM46C	1.32897	1.73e-10				IL2RG	1.21927	1.08e-07	SPARC	0.952383	0.00262829
lincRNA:chr1:1100287-1108062_F	1.31357	3.33e-11				LGALS2	1.21777	0.00739087	PALM	0.949857	0.00277782
lincRNA:chr2:20783219-20795366_F	1.30019	2.55e-11				TIFAB	1.19657	0.0013235	FNDC1	0.944749	0.001016
NP113779	1.24477	3.44e-06				S1PR4	1.19095	2.93e-07	COL1A2	0.939687	0.00075133
ENST00000390252	1.22562	3.21e-07				AMICA1	1.18417	0.000275842	CTSK	0.925108	0.00204194
lincRNA:chr2:131595455-131614380_F	1.2203	9.07e-11				LOC100508196	1.1595	6.83e-05	COL5A1	0.914967	0.00103732
NYX	1.20487	2.55e-11				ENST00000466254	1.15484	9.37e-10	PTPRD	0.914025	7.25e-05
CHIT1	1.19655	0.0208863				TBC1D10C	1.12757	4.31e-07	COL16A1	0.912584	0.000481831
CPNE5	1.19292	5.19e-06				SELL	1.11662	2.35e-07	TAGLN	0.908591	0.0117674
CD19	1.18999	0.00023945				CD8B	1.10136	5.95e-05	FAM155A	0.897913	0.0111378
FER1L4	1.16842	0.000401661				ENST00000390622	1.09409	3.71e-05	CHRD	0.890964	0.00108579
ENST00000390291	1.16361	1.71e-06				RARRES1	1.09319	0.0339413	COL5A2	0.888841	0.00175275
ENST00000390243	1.16124	8.94e-05				RASGRP1	1.06663	1.76e-07	PPP1R3C	0.888518	0.000944426
TNFRSF17	1.13956	8.94e-09				A23747	1.06561	2.72e-09	PDGFRL	0.874027	0.00012541
SMR3A	1.13257	9.25e-11				RAC2	1.05037	1.47e-11	COL1A1	0.869343	0.00103732
lincRNA:chr7:32953000-32983675_R	1.11413	4.19e-10				BATF2	1.04676	0.00140136	AEBP1	0.85845	0.000394681
TMEM238	1.11185	6.25e-06				CXCR2P1	1.03066	0.000601885	MMP2	0.845626	0.000218907
ENST00000390317	1.11158	4.63e-08				GBP4	1.02677	0.000356911	C1S	0.845559	0.000394681
ENST00000390265	1.10481	1.54e-07				HLA-DPA1	1.00445	0.0029094	PPAPDC1A	0.835188	0.00277782
lincRNA:chr1:201509727-201545677_F	1.08786	1.82e-10				STAT1	1.00303	1.12e-05	CFH	0.828295	0.000421061
ENST00000390285	1.07012	3.09e-05				BIRC3	0.972402	2.46e-05	MGC24103	0.811175	0.0111378
lincRNA:chr1:181063077-181073127_F	1.06018	2.36e-09				CXCL13	0.967952	4.85e-05	COL3A1	0.806772	0.00211808
THBS4	1.05333	0.0414425				CD40LG	0.966845	2.4e-06	ADAMTSL2	0.798716	0.0308544
RAPH1	1.0413	2.68e-08				CCL5	0.958595	8.38e-07	OSBPL5	0.786236	0.0102032
lincRNA:chr6:158663162-158717262_F	1.02905	1.12e-10				BATF	0.953149	2.33e-05	ANTXR1	0.784797	0.0111378
AK127961	1.0061	1.97e-08				FAM26F	0.950036	8.89e-07	RASL11B	0.782791	0.000827911
TXNDC5	0.995479	1.75e-05				ENST00000390477	0.947148	0.00015533	PCSK5	0.777501	0.010782
lincRNA:chr19:42774860-42784435_R	0.987778	2.61e-08				TRAF3IP3	0.947116	1.22e-06	MXRA5	0.774003	0.00154741
ENST00000390294	0.960954	8.3e-05				SKAP1	0.946163	1.83e-05	STMN2	0.773375	0.0216728
PIM2	0.959878	8.94e-09				C15orf48	0.92357	0.00739087	FV367791	0.761136	0.000245264
lincRNA:chr7:25978475-25989975_R	0.953335	0.000428236				PSTPIP1	0.921279	0.000105715	MRC2	0.761016	0.000217452
lincRNA:chr3:171509574-171527714_R	0.952638	6.45e-06				ENST00000425189	0.912404	0.00201144	SFRP4	0.758166	0.0259572
ENST00000390247	0.951943	2.78e-05				IL7R	0.910971	0.0170645	SNED1	0.756109	0.0068431
lincRNA:chr17:38679761-38683252_R	0.94787	3.07e-08				PATL2	0.906063	5.29e-06	FMOD	0.755426	0.00204194
AF194718	0.935061	0.000411711				DENND1C	0.901574	5.29e-06	LEPREL2	0.753788	0.00319057
ENST00000498435	0.91814	3.12e-05				RASAL3	0.897594	7.25e-06	VCAN	0.747341	0.000481831
ENST00000492167	0.910833	9.15e-06				lincRNA:chr14:23018310-23025460_R	0.897435	1.18e-07	CCDC80	0.742676	0.0138997
AB363267	0.908888	0.00166763				LCK	0.892628	2.48e-09	FBXL7	0.739595	0.00204194
lincRNA:chr10:72833019-72847269_F	0.904061	1.68e-08				LOC100131733	0.886427	7.23e-06	EFEMP2	0.736199	0.000116695
lincRNA:chr1:41238013-41247638_R	0.90239	2.25e-08				MIAT	0.886114	0.0019702	SRPX2	0.730182	0.00280491
lincRNA:chrX:45598006-45710454_F	0.899615	4.6e-09				C16orf54	0.879468	1.21e-07	C1QTNF6	0.72819	0.00128376
lincRNA:chr9:32936300-32949200_R	0.890093	8.42e-09				C1QA	0.878196	0.000120226	TIMP2	0.723279	0.0115243
ENST00000390610	0.882015	0.00166763				HCST	0.877488	1.05e-10	PRRX1	0.717851	0.00100598
ENST00000390319	0.875197	0.000178224				NCR3	0.870008	0.000682857	lincRNA:chr2:100851143-100863413_F	0.707525	0.000394681
lincRNA:chr18:33161080-33207449_F	0.852891	4.76e-11				IL21R	0.869353	0.00070423	VSTM4	0.707264	0.0380237
ENST00000491977	0.846068	0.000206121				SAMD9L	0.864297	3.24e-06	RAB31	0.700525	0.0011127
FKBP11	0.840208	6.62e-06				HLA-F	0.852138	1.85e-05	THY1	0.700519	0.00538503
A_33_P3299047	0.837374	7.47e-08				IFI30	0.847782	0.00116269	lincRNA:chr2:216585154-216585719_F	0.690045	0.0136011
ENST00000390622	0.81645	0.00184053				TAP1	0.8388	9.7e-06	CERCAM	0.689741	0.00236183
Q8VGA8	0.810063	2.61e-08				HLA-C	0.838056	0.00438124	HMCN1	0.683303	0.000915054
CCDC129	0.808889	1.81e-08				LCP1	0.836315	1.73e-05	CLEC11A	0.681967	0.0011127
XBP1	0.808356	0.0153577				THC2502506	0.828717	2.13e-05	KIAA1217	0.679429	0.000752925
lincRNA:chr2:77321142-77331767_R	0.804534	8.14e-07				IL10RA	0.82533	2.62e-07	NUAK1	0.678199	0.0386646
ENST00000536864	0.786943	3.28e-07				CD3G	0.823457	1.08e-06	C12orf70	0.677556	0.0111378
MZB1	0.786567	0.0153506				C1QB	0.814103	2.6e-05	SULF1	0.674476	0.027326
lincRNA:chr2:56190790-56194076_R	0.781794	5.19e-06				SH2D2A	0.808542	2.37e-07	GPX8	0.672357	0.000245264
ENST00000468879	0.780045	0.000150303				ORM2	0.794761	0.0431033	ST6GAL2	0.672053	0.00204194
OR1S1	0.777368	1.37e-07				ZBED2	0.793001	1.04e-05	SPON1	0.669814	0.0216728
MGC16025	0.762482	1.91e-06				CTLA4	0.79257	0.000857656	NOX4	0.668035	0.010782
lincRNA:chr7:226042-232442_R	0.760481	3.88e-08				RARRES3	0.791585	0.0232677	MRVI1	0.667301	0.0121516
DERL3	0.754315	0.0109647				TMIGD2	0.790295	0.00108626	ISM1	0.664086	0.0135882
lincRNA:chr7:32969506-32973492_R	0.752811	2.39e-06				OR10H2	0.789434	5.33e-05	PLAT	0.658634	0.00277782
ENST00000390605	0.738353	0.00318538				FPR3	0.782863	0.00125478	FAM198B	0.653972	0.00808013
XLOC_l2_012374	0.737052	1.02e-06				RGL4	0.781582	4.31e-07	ZFHX4	0.645247	0.000342713
LOC338739	0.732578	6.43e-07				CXorf65	0.780774	0.00525466	SYNC	0.639494	0.000337148
lincRNA:chr17:73598283-73599500_F	0.728032	3.24e-07				ATP8A1	0.780762	1.73e-05	SSPN	0.638835	0.0119115
ENST00000390633	0.713255	0.00601081				SLAMF1	0.776053	0.000134476	PRICKLE1	0.631518	0.0115243
ENST00000474213	0.709742	0.0130044				HLA-DOB	0.775966	0.0219777	CTHRC1	0.630425	0.0150663
ENST00000390436	0.707872	3.8e-07				FYB	0.771643	1.6e-09	MIR100HG	0.630171	0.00100598
lincRNA:chr18:59259607-59415414_F	0.703984	1.1e-06				FASLG	0.770054	6.07e-06	ZEB1	0.627411	0.00106144
C11orf20	0.703816	0.000197306				PTPRC	0.76718	0.00140136	DPYSL3	0.62257	0.0142988
lincRNA:chr10:89908970-89919320_F	0.70232	4.07e-06				HLA-DRB1	0.765133	0.000827624	GLI3	0.621226	0.00549509
lincRNA:chr2:218461580-218481005_R	0.699218	6.26e-08				RTP4	0.761059	0.0144961	ITGBL1	0.620186	0.00369331
lincRNA:chr14:21670160-21677035_F	0.698448	4.75e-06				CYTIP	0.760403	5.23e-06	CYS1	0.6186	0.000782721
lincRNA:chr10:99179035-99184435_R	0.697073	2.78e-05				STAT4	0.753403	1.08e-06	ZNF503	0.618171	0.0138062
lincRNA:chrX:71300975-71319175_F	0.6959	4.31e-06				LAG3	0.748776	0.000841256	PDGFRB	0.616872	0.0419003
lincRNA:chr14:32360774-32374086_F	0.693933	3.81e-06				PDCD1	0.748492	0.00123142	FHL1	0.609567	0.0122869
ENST00000479981	0.68022	0.000893748				TFEC	0.742424	0.00147034	FIBIN	0.607013	0.0202483
A_33_P3225572	0.679971	2.04e-07				SERPINA1	0.740653	0.0240691	CYTH3	0.604874	0.000569621
lincRNA:chr1:27845013-27856588_F	0.679133	1.7e-07				NLRC3	0.735109	2.68e-07	RECK	0.604379	0.00106144
ZNF714	0.675464	2.81e-06				SPOCK2	0.733571	0.000455915	C1R	0.601426	0.0121516
SSR4	0.672953	0.000582131				IGFLR1	0.731859	0.0327735	RARRES2	0.596442	0.0117674
lincRNA:chr8:134368768-134379793_F	0.669772	3.91e-06				PPP1R16B	0.730992	2.7e-07	HHIPL1	0.59172	0.0433905
DUSP26	0.66604	0.00722059				WARS	0.723388	5.56e-05	DACT1	0.588906	0.0259572
ENST00000390615	0.664579	0.000227729				TMC8	0.723041	0.000279929	TMEM200A	0.588725	0.00128376
lincRNA:chr12:117562392-117569365_R	0.662338	6.43e-07				JAK3	0.719559	1.69e-05	MSRB3	0.585493	0.0138997
ENST00000532821	0.658747	1.71e-06				WIPF1	0.715732	0.00130137	PPIC	0.584847	0.00140686
lincRNA:chr13:44760050-44767325_F	0.655629	6.38e-06				lincRNA:chr14:23018310-23025460_F	0.710409	0.00189861	KANK2	0.582511	0.00823765
ENST00000390600	0.648276	0.000179662				INSL3	0.707481	0.00240996	SGCD	0.581828	0.00211808
ENST00000307548	0.647734	0.000135618				CD97	0.706851	1.61e-07	GPR124	0.571822	0.0122869
lincRNA:chr18:33466152-33528357_F	0.645025	1.32e-06				DOCK8	0.703874	3.59e-08	FHOD3	0.570183	0.00013999
lincRNA:chr12:76015433-76261508_F	0.644813	3.93e-06				TNFAIP8	0.703096	2.63e-06	MFAP3L	0.567242	0.00280491
ENST00000390301	0.638317	0.000850064				CD4	0.696084	0.00161246	EMILIN1	0.56584	0.0214002
KRT73	0.633156	1.54e-07				SAMD3	0.695917	4.17e-07	HOXC6	0.564377	0.00388884
MEI1	0.630101	0.000172879				ARHGAP25	0.694219	4.01e-06	lincRNA:chr14:96548697-96561747_F	0.560492	0.00676375
ENST00000398957	0.627701	6.91e-06				SOD2	0.693798	0.0081295	CTSO	0.55854	0.00262829
lincRNA:chr12:68421607-68422081_F	0.619601	0.0189391				ISG20	0.693522	0.00057949	GPC6	0.557988	0.044188
PGA3	0.613321	1.01e-06				ITGB7	0.693162	0.00367437	LRRC15	0.555533	0.000394681
LOC283710	0.612759	3e-05				BST2	0.689296	0.0232677	PPAPDC3	0.549995	0.00558833
SPRNP1	0.612288	2.15e-06				GIMAP7	0.688953	0.00190807	GREM2	0.549986	0.0442506
BCORP1	0.612048	1.5e-06				TIGIT	0.688363	5.95e-05	ASPN	0.547549	0.0431235
RARG	0.608954	4.17e-06				LY9	0.686722	5.56e-05	XG	0.53817	0.00106144
lincRNA:chr2:64412771-64525721_R	0.604858	2.6e-07				WDFY4	0.684988	0.000739878	PMP22	0.535647	0.0388658
PHOSPHO1	0.6048	0.00442685				FGD3	0.683298	0.000279929	PDGFC	0.529065	0.000782721
STARD5	0.600377	0.00118524				HMHA1	0.68183	9.7e-06	LOXL1	0.524966	0.000116695
HERPUD1	0.596022	0.000205103				GIMAP4	0.678654	0.00989306	C14orf132	0.524103	0.00401381
FAM21C	0.595379	0.000345195				ARHGAP9	0.671982	2.59e-06	IFI27L2	0.521835	0.00834138
lincRNA:chr18:59259608-59416029_F	0.583195	7.15e-05				CYBB	0.670443	0.00144921	GLT8D2	0.521507	0.000394681
SSX3	0.583177	5.71e-07				SNX10	0.668633	0.000221447	MARVELD1	0.5204	0.00438574
LOC100129196	0.583136	1.5e-06				PSMB10	0.668551	2.48e-09	CYBRD1	0.518848	0.00597094
lincRNA:chrX:17782154-17792979_F	0.576623	7.32e-08				SOCS1	0.667837	0.000201876	lincRNA:chr14:96507172-96661947_F	0.517511	0.0127894
lincRNA:chr13:51103249-51263599_R	0.576517	0.00016006				CASP1	0.664602	3.62e-05	LOC642361	0.515328	0.010782
THC2688744	0.569149	1.12e-05				LILRB4	0.664128	0.00151885	CTSF	0.508167	0.0226633
CD38	0.565382	0.00196919				CD27	0.655233	0.00388618	FKBP9	0.506563	0.010782
lincRNA:chr6:6683526-6701601_R	0.560213	4.52e-06				RHOH	0.649557	0.000765615	FAP	0.505829	0.0161833
CD27	0.558776	0.0139595				VPREB3	0.644199	0.032266	C1QTNF5	0.502519	0.0369222
lincRNA:chr5:102544301-102549901_R	0.556823	7.5e-05				HLA-G	0.643252	0.0230797	AKAP13	0.493281	0.00144476
lincRNA:chrX:13269404-13285729_F	0.556777	1.91e-05				OAS2	0.63912	0.0460562	HSPA12A	0.491581	0.0440278
lincRNA:chr6:113672332-113690598_R	0.556144	2.78e-05				ACSL5	0.6383	0.000702692	TSHZ3	0.48665	0.0154513
AF336885	0.551821	0.000705801				TYMP	0.638028	0.00286531	CARD6	0.482964	0.0346337
lincRNA:chr2:178145929-178216641_R	0.548727	3.06e-05				DENND2D	0.637775	2.49e-05	C5orf62	0.474218	0.0216728
A_33_P3268167	0.542098	9.39e-05				ASB2	0.632751	0.0444521	ITGB5	0.466077	0.0342671
ENST00000390594	0.538803	0.0070715				CD38	0.62706	0.00100459	FZD1	0.462029	0.00750677
lincRNA:chr12:122243692-122252067_R	0.531514	3.53e-06				RGS18	0.623658	0.000136011	GXYLT2	0.461222	0.0420775
lincRNA:chrX:17782154-17795079_F	0.531073	8.32e-06				SLC9A9	0.623568	0.000740523	ALKBH7	0.46013	0.0262972
BCL2L15	0.530678	0.000195587				IRF7	0.621863	0.0163892	ABCB4	0.458143	0.00922562
PTMS	0.527921	8.4e-05				SUSD3	0.620805	0.025434	RUNX1	0.456503	0.010782
LOC151009	0.523982	1.12e-05				HLA-DOA	0.618837	0.0175829	ZCCHC14	0.450586	0.0190037
LOC100130811	0.523921	0.0125635				LAP3	0.61768	0.000449567	A_33_P3413997	0.450569	0.0259572
ACTR3BP5	0.522266	0.000127539				FCER1G	0.617373	0.000783881	LOC400236	0.444531	0.015607
FAM153A	0.519225	3.02e-06				APOC1	0.613898	0.0497282	DAPK3	0.444234	0.0420173
LOC388210	0.517458	3.31e-06				GMFG	0.611177	9.88e-06	CRAT	0.441171	0.0229131
SPCS3	0.516154	0.00349778				IL32	0.609751	0.000810805	TRO	0.44057	0.028422
LOC389602	0.510995	9.58e-06				CMPK2	0.609306	0.0229337	PDLIM5	0.440514	0.0468333
LOC100288292	0.510032	6.54e-07				TOX2	0.608436	0.0316368	FERMT2	0.432583	0.0317931
ANKRD36BP2	0.503417	0.00129185				CD6	0.600495	5.32e-05	BNC2	0.419418	0.00420187
IQSEC3	0.501523	6.26e-06				LGALS9C	0.597679	0.000513193	P4HA2	0.41445	0.0433411
lincRNA:chr1:180929852-180942126_R	0.501118	1.35e-05				HCLS1	0.595903	5.64e-05	LIMA1	0.411118	0.00280491
lincRNA:chr11:2004771-2007592_F	0.50067	5.34e-05				SLAMF8	0.595117	0.0128858	CYP2U1	0.411111	0.0142543
lincRNA:chr14:104345747-104366672_F	0.497643	2.78e-05				IRF8	0.592019	0.00140136	PTN	0.406058	0.0248025
lincRNA:chr9:14587837-14588176_F	0.497599	0.00019992				ENST00000517927	0.591317	0.00310087	CLMP	0.398972	0.0332199
SLC12A5	0.496365	0.000387407				LCP2	0.588063	0.000608546	SFRP2	0.398441	0.0369645
IP6K2	0.492131	0.00218912				ARHGAP4	0.588041	0.000682286	CMTM3	0.396943	0.0408623
ENST00000390468	0.491198	3.44e-06				LILRB3	0.585732	0.0478382	2015-09-11	0.396024	0.00901275
lincRNA:chr9:33011575-33024725_R	0.490512	5.6e-06				IL15	0.584059	0.0330248	A_19_P00325768	0.394052	0.015607
ENST00000390297	0.490448	0.0023163				KLRB1	0.583577	0.00486877	UBR1	0.39095	0.00224615
SLAMF7	0.487666	0.00224498				TNFRSF8	0.583287	0.00305304	XLOC_001952	0.387127	0.0321781
ENST00000424969	0.487049	0.000205103				P2RY6	0.581617	0.0487365	JDP2	0.38394	0.00452129
lincRNA:chr1:234780127-234798577_R	0.486808	0.00115356				CXCR6	0.58018	0.000476548	C9orf3	0.382586	0.00591145
lincRNA:chr1:153768876-153777076_F	0.486208	9.48e-06				SLC2A6	0.578734	0.0480517	CRY2	0.381053	0.0158669
lincRNA:chr2:232250156-232258431_R	0.483719	1.28e-05				FAM78A	0.578314	0.000199006	ECM2	0.380593	0.0142543
CORT	0.48034	3.06e-05				FAM113B	0.576642	0.00272834	SPOCK1	0.38038	0.0498834
HSH2D	0.47859	0.00232341				NUAK2	0.576541	0.00281317	MVP	0.373898	0.0306031
KCNA3	0.477932	8.2e-05				ITGB2	0.57652	0.0125331	MYOF	0.372522	0.0142275
SLC43A1	0.476866	0.000362842				SLAMF7	0.573111	0.00051213	MAGI2-AS3	0.36484	0.014164
OR1S2	0.476354	6.43e-07				PRKCB	0.571194	0.000735708	lincRNA:chr12:46826133-46974783_F	0.363151	0.0453646
A_33_P3401084	0.475968	5.9e-05				LOC439949	0.56687	0.000198211	PRAF2	0.359869	0.0454316
lincRNA:chr4:68294580-68337980_F	0.474364	0.000184439				LAIR1	0.565785	0.00170354	lincRNA:chr3:114031960-114042235_R	0.337538	0.0391629
lincRNA:chr6:43988722-43993947_R	0.472065	2.88e-05				EMB	0.563586	0.000419414	KDELC2	0.336343	0.049865
AK130802	0.47003	0.00154833				MYO1F	0.5625	0.000151047	GALNT10	0.332409	0.0241791
lincRNA:chr7:131549760-131565160_R	0.467686	7.64e-05				TXNDC3	0.561379	0.011103	DAB2	0.312341	0.0336817
DUSP15	0.464815	9e-05				CD28	0.561296	0.0095118	A_33_P3218564	0.311419	0.0340103
SEC14L1	0.463576	0.000194945				GIMAP1	0.559139	0.00030383	PCOLCE	0.309032	0.0308544
PDK1	0.463255	0.00019992				MNDA	0.559018	0.0257497	TLN2	0.304007	0.0273245
lincRNA:chr5:95919519-95995094_R	0.462899	6.65e-06				HLA-DMA	0.555823	0.00748565	GBP3	0.301532	0.0227615
PRDM1	0.461381	0.0159456				TLR1	0.554901	0.00341683	CILP2	0.299068	0.0468333
lincRNA:chr16:11481046-11484311_F	0.460806	4.32e-05				INPP5D	0.553745	1.98e-05	SORCS2	0.297293	0.0152944
PSD4	0.457982	1.03e-06				ABI3	0.553655	0.0238217	IGFL2	0.29128	0.03033
lincRNA:chr22:46451236-46516536_R	0.457617	0.0002409				AIF1	0.552483	0.000120226	SNTB2	0.28147	0.00886629
ENST00000390454	0.454507	8.8e-07				LRMP	0.550376	0.000682286	TRPC1	0.281076	0.0201464
ENST00000552290	0.452437	9.83e-05				TAP2	0.548599	0.0268308	COPZ2	0.274768	0.00336213
LRP3	0.44918	1.81e-05				PSME2	0.547852	0.000181491	RNASEL	0.273103	0.0153231
lincRNA:chr1:118374652-118400852_R	0.448364	0.000287182				PYCARD	0.543135	0.000268881	ARL2BP	0.267212	0.00808013
lincRNA:chr12:132832202-132856777_F	0.447954	0.00484056				DAPP1	0.543107	0.00361336	ZFPM2	0.259767	0.0138997
OR10J5	0.447839	0.00125296				B2M	0.540259	0.0439463	ZFHX3	0.252061	0.0401335
lincRNA:chr2:233444129-233451012_F	0.445749	6.65e-06				HLA-DMB	0.539485	0.0190677	LOC283867	0.250249	0.0294678
SLC16A11	0.445156	0.000123387				HLA-E	0.536562	0.00199459	LPAR1	0.238709	0.0444582
lincRNA:chr2:74212792-74262017_R	0.442659	0.000158739				HLA-A	0.526958	0.0303267	SEC14L2	0.194084	0.0308544
LOC652119	0.442526	0.000181798				CD79A	0.526502	0.0210489	RTN2	0.183198	0.0227615
lincRNA:chr2:70212746-70263471_R	0.442494	8.07e-05				FLJ32255	0.526122	0.0363688	PRR5L	0.183024	0.0328763
lincRNA:chr7:93318289-93329939_R	0.440337	5.97e-05				GIMAP6	0.525471	0.0402823	C14orf56	0.178886	0.0330157
lincRNA:chr6:21666674-22221946_R	0.438443	3.66e-05				PTK2B	0.523942	0.000236913	PRRX2	0.177942	0.00669913
lincRNA:chr2:74225470-74225673_R	0.437709	4.02e-05				FAM20A	0.523287	0.0303267	lincRNA:chr1:85933672-85934049_R	0.156412	0.0115243
ADAMTS7	0.437189	0.000428236				DHX58	0.518743	0.00712333	LOC727993	0.124437	0.013077
lincRNA:chr10:104838935-104844310_F	0.436333	0.000737686				PRIC285	0.515367	0.0365396	FGF4	-0.0900454	0.0468333
SEC11C	0.435285	0.00287976				MCOLN2	0.512747	0.0249807	IL17F	-0.0941604	0.0440278
lincRNA:chrX:53685100-53711400_R	0.432542	0.0172834				UBASH3A	0.512053	0.000400731	AW593215	-0.102584	0.0302708
SEL1L3	0.431596	0.0184149				C12orf35	0.51146	0.0050034	RNU4ATAC	-0.110298	0.0146732
GPR150	0.430293	0.000282699				VAMP8	0.511154	0.00987333	AB305952	-0.121541	0.00549509
UBE2J1	0.429908	0.0353428				SCO2	0.511056	0.0050034	A_33_P3248077	-0.130189	0.0408952
ENST00000431767	0.429488	0.00443532				NR1H3	0.509997	0.0265247	CCAR1	-0.139924	0.0492757
ST6GAL1	0.429023	0.0213126				ARHGDIB	0.508994	0.000230203	TRDMT1	-0.14013	0.0493504
lincRNA:chr5:1167850-1186275_R	0.428743	0.000226064				LST1	0.50845	0.0418247	LOC401588	-0.156149	0.0138997
lincRNA:chr18:3347700-3348205_F	0.428468	2.01e-05				CLIC2	0.505473	4.12e-05	MAPKAPK5	-0.182598	0.0227615
XLOC_l2_014959	0.427671	0.00019992				HLA-DRB3	0.501931	0.00142027	RAVER2	-0.192652	0.0115243
ENST00000383417	0.426442	1.61e-05				ICAM1	0.501444	0.0130021	MAPKBP1	-0.197	0.0361124
ZNF215	0.425087	0.00118284				SLA	0.497125	0.0130031	MELK	-0.210273	0.00586739
lincRNA:chr21:30565800-30660465_R	0.424839	0.000856506				TRIM7	0.496704	0.0447833	BRCA1	-0.212102	0.0175033
RP11-165H20.1	0.424336	9.68e-05				RLTPR	0.490484	0.000614709	CBLL1	-0.218637	0.0350877
lincRNA:chr10:5156300-5171275_F	0.422628	0.0002409				CYTH4	0.49041	0.00243601	AURKA	-0.229103	0.0153231
lincRNA:chr5:149980882-149995557_F	0.420306	0.000226064				KLRC1	0.490308	0.0245409	YY1AP1	-0.234774	0.0104349
A_33_P3407691	0.419947	2.07e-05				GPSM3	0.489871	3.61e-05	EEF1E1	-0.236799	0.0201464
DNAJC4	0.41655	0.00018334				MS4A4A	0.486742	0.0352323	DHX9	-0.241224	0.019285
ENST00000390625	0.414089	0.00871613				LOC100132707	0.485606	0.0411658	WDR3	-0.241595	0.0155897
LOC150622	0.413803	9.27e-06				PPP2R2B	0.485079	0.0164085	CWC27	-0.243006	0.0449916
A_33_P3227010	0.411553	0.000879447				lincRNA:chr6:33091097-33099422_R	0.483041	0.0400305	GPT2	-0.253474	0.0068431
lincRNA:chr1:33869120-33896238_F	0.411407	0.000205103				MMP25	0.481484	0.00649256	ELAC1	-0.256057	0.0449078
LOC100133286	0.404301	0.000623021				DOCK10	0.481215	0.00325953	FAM83D	-0.28261	0.0350877
lincRNA:chr2:241928152-241929111_R	0.403851	0.000632364				GSTK1	0.480372	0.0197676	ENST00000440540	-0.283525	0.0256453
lincRNA:chrX:117240572-117247172_R	0.403187	0.000400152				PLAC8	0.480031	0.00129697	LRR1	-0.29153	0.0229015
A_33_P3329104	0.402502	0.000591294				JAK2	0.477736	0.00245042	CDK1	-0.305734	0.0129871
lincRNA:chr18:36967212-37153620_R	0.402462	6.45e-06				NFKBIE	0.47642	0.00547949	TDG	-0.313227	0.0391629
lincRNA:chr12:54128308-54135158_R	0.401243	0.0136788				MFNG	0.47566	0.00311816	CEP250	-0.313392	0.015607
ENST00000446887	0.400782	0.000122476				APBB1IP	0.474251	0.017779	LTV1	-0.32536	0.0440278
lincRNA:chr4:110462151-110470201_F	0.400467	0.000271495				TLR7	0.47384	0.00301502	NCL	-0.326808	0.018351
lincRNA:chr4:2460833-2464216_R	0.400232	6.76e-05				PARP10	0.469544	0.0206625	FBXO5	-0.328031	0.019285
DA197111	0.399814	0.000278821				SP140	0.467484	0.0159446	UTP3	-0.332313	0.0068431
CU691877	0.397476	0.00049583				VNN2	0.463549	0.0331334	SMC4	-0.338449	0.0115243
lincRNA:chr9:23671778-23672397_F	0.393753	9.83e-05				GPR155	0.460288	0.00954799	SLC7A11	-0.338734	0.0154513
CTSL1P2	0.392171	0.00247629				CORO1A	0.459811	0.0466321	CHAF1A	-0.339564	0.0138997
lincRNA:chr5:92762769-92774694_R	0.391864	0.00155096				NCEH1	0.459028	0.0016525	DUSP12	-0.34001	0.00216294
P39188	0.3915	0.000158739				PTPN7	0.458725	5.56e-05	NUP107	-0.379819	0.0122869
A_33_P3273399	0.388376	0.00121546				FCHO1	0.456974	0.000532479	FDPS	-0.381649	0.0308544
lincRNA:chr9:133230324-133233284_R	0.384489	9.22e-05				TYROBP	0.448277	0.0165553	DNAJC2	-0.382434	0.0159817
lincRNA:chr2:37776096-37862046_R	0.384274	1.45e-05				PRKCH	0.444927	0.0288632	HJURP	-0.39275	0.015607
BM477328	0.383771	0.000130193				KLRC4	0.442355	0.0136965	PDCD2	-0.394618	0.0468969
LRRC16B	0.38353	0.000893748				TNFRSF14	0.44115	0.000689211	USP1	-0.40568	0.0237125
C1orf190	0.38101	0.0189908				CIITA	0.440273	0.0388644	LOC152217	-0.408175	0.0233574
lincRNA:chr1:181063077-181073127_R	0.380697	0.000705801				RNASE6	0.439465	0.00511237	SLC25A3	-0.408288	0.0404054
KCNN3	0.380356	0.00654241				VAMP5	0.437338	0.0437726	SF3A3	-0.412403	0.0436365
A_33_P3261074	0.380231	1.8e-05				NMI	0.434928	0.00256689	TIMELESS	-0.414529	0.0143363
lincRNA:chr6:29983946-29992471_F	0.380097	3e-05				IL2RB	0.433191	1.83e-05	SNRPF	-0.415504	0.015607
NKX1-2	0.379448	0.000176743				IDO2	0.432967	0.0236663	MAGOH	-0.422083	0.0468969
ITM2C	0.3776	0.0363186				MPEG1	0.432953	0.0125807	NASP	-0.424601	0.0111378
GPR119	0.376449	0.000161857				TRIM22	0.429249	0.00325514	CDC7	-0.426128	0.0408952
lincRNA:chr13:50657699-50697649_R	0.375047	0.000269623				CYFIP2	0.428342	0.00290228	PFDN2	-0.437871	0.00750677
C2CD4C	0.37299	2.78e-05				TNFAIP8L2	0.425973	0.00899305	HNRNPA3	-0.438122	0.0181655
lincRNA:chr13:67955599-68781749_F	0.371263	7.86e-05				LINC00426	0.42385	1.69e-05	PAXIP1	-0.451106	0.00624083
RBMY1B	0.370181	1.69e-05				CDC42SE2	0.42236	7.91e-05	NUP205	-0.453051	0.00150701
HOXB13-AS1	0.368619	0.000521338				GBP2	0.419675	0.000400731	GMPS	-0.46277	0.0201153
A_24_P110273	0.367711	0.000518454				IFIT5	0.419175	0.0218855	TXN	-0.465221	0.0436365
LOC100130345	0.364099	0.00159856				TNFAIP2	0.414593	0.0398775	RRM1	-0.467761	0.0171942
lincRNA:chr5:74327969-74348269_F	0.364012	0.00760943				SASH3	0.414221	0.000185305	TRIM24	-0.478323	0.00401381
lincRNA:chr10:72800569-72813581_F	0.36146	0.00465045				LAT	0.41392	0.000449567	KIF2C	-0.487451	0.0350877
NP511209	0.35961	0.00129185				KIR2DS2	0.413392	0.00305304	TFDP1	-0.487507	0.0216728
lincRNA:chr13:33888375-33923550_F	0.358514	0.000108533				AV659465	0.411542	0.0382247	DKC1	-0.49439	0.010782
lincRNA:chr5:12625075-12747025_F	0.358044	4.71e-05				NFKB1	0.410373	0.029011	PTTG1	-0.495748	0.0468333
GGT1	0.356556	0.00464744				SH2D1B	0.40864	0.0100953	PDHA1	-0.49683	0.0259048
SPAG4	0.354904	0.00395205				TXK	0.405688	0.045611	EZH2	-0.508642	0.0068431
PARVG	0.354376	0.000176743				MLKL	0.402546	0.0116826	HAUS8	-0.51723	0.0371675
SELK	0.353586	0.0170852				GIMAP5	0.401137	0.0139903	NUSAP1	-0.522966	0.0229131
lincRNA:chr14:59882547-59912047_F	0.352979	0.000705801				LTB	0.40064	0.0314941	FAM189B	-0.52602	0.00398749
MEX3D	0.351133	0.0199501				LOC219731	0.398719	0.0497949	LMNB1	-0.526202	0.00109879
TPP1	0.350431	0.00310995				RIMBP3	0.397773	0.018269	PPIF	-0.528833	0.00922649
REEP1	0.350094	0.00177701				PLCB2	0.39657	0.0401788	HSPA14	-0.540921	0.00211808
lincRNA:chr13:103554249-103568024_R	0.349275	1.23e-05				PLEKHA2	0.395527	0.000783881	UBE2T	-0.546133	0.0308544
ENST00000478163	0.348507	0.000124017				RHEBL1	0.393654	0.0243402	CDCA5	-0.546134	0.035188
lincRNA:chr18:35246652-35296677_F	0.347734	0.0286411				TNFRSF25	0.393627	0.0275395	PAICS	-0.546967	0.000895093
ENST00000485332	0.347139	0.000428433				C17orf87	0.393594	0.000539038	EBNA1BP2	-0.551771	0.0350877
MOB1A	0.346005	0.00145578				GLRX	0.393096	0.0286008	TYMS	-0.607823	0.0274393
lincRNA:chr4:127694975-127709825_F	0.343951	0.00376999				NR3C1	0.391362	0.0224568	UNG	-0.610366	0.00847076
ERCC2	0.343646	0.000818507				VMA21	0.390774	0.0105387	GTPBP4	-0.623201	0.00443171
IQGAP2	0.343445	0.0139218				WDR67	0.389047	0.0408054	UBE2C	-0.645372	0.0143363
LTB4R2	0.341802	0.000656397				EFHD2	0.387984	0.00337007	MCM7	-0.698537	0.0308544
LOC497256	0.341014	0.000634032				RAB37	0.385435	0.0121398	C10orf35	-0.704737	0.0122869
lincRNA:chr13:101223049-101236424_R	0.340294	0.000204287				ZBP1	0.385185	0.00349786	STMN1	-0.717003	0.0427259
FAM90A10	0.34002	0.00019992				SARDH	0.384395	0.0342086	RAD54L	-0.750315	0.00100598
MUC4	0.338959	0.00103631				FYN	0.383833	0.0400305	CDCA8	-0.843094	0.0294678
lincRNA:chr4:123620575-123629031_R	0.335257	0.00124748				THC2601170	0.382799	0.000759866
lincRNA:chr1:93796837-93806487_F	0.334237	0.00275537				PTPN22	0.382022	0.000400731
KRTAP10-1	0.333395	0.000586091				OBFC2A	0.381037	0.00144921
UNC93B1	0.333066	0.00120041				CHST12	0.378504	0.00387389
lincRNA:chr22:46476224-46493888_F	0.331093	0.000256897				lincRNA:chr1:89874262-89947412_R	0.376092	0.00604951
CC2D1A	0.330671	0.00028513				TNFSF13B	0.373596	0.0301848
ACAP1	0.329928	0.000205587				RASSF4	0.356177	0.0340811
ENST00000471857	0.327311	0.00847907				ARAP2	0.352182	0.00251639
TTC22	0.325385	0.0107612				CASP10	0.351378	0.0243402
lincRNA:chr8:134368768-134379793_R	0.324578	7.64e-05				AIM2	0.350489	0.00167611
lincRNA:chr12:101125994-101157894_F	0.32314	0.00143307				CD69	0.34897	0.00274805
lincRNA:chr16:11581190-11588611_F	0.322579	0.00126082				CXCL11	0.348853	0.00238293
TM6SF1	0.322108	0.000705801				FLJ35776	0.348409	0.0190677
lincRNA:chr6:106858857-106926507_R	0.320453	0.000818507				ST8SIA4	0.345651	0.000682286
LOC100128675	0.320226	0.00169453				PREX1	0.337573	0.00545718
lincRNA:chr21:45573097-45578347_R	0.319639	0.010183				ITM2B	0.336586	0.0290337
lincRNA:chr4:83812701-83821724_F	0.318502	0.00166763				MYO7A	0.334438	0.0337965
lincRNA:chr6:27663246-27683586_R	0.318002	0.000591294				RPS6KA3	0.331212	0.00458401
lincRNA:chr14:61762697-61774172_R	0.316915	0.000395418				USF2	0.331201	0.0479772
lincRNA:chr20:31148894-31161690_F	0.315891	0.0149769				LPXN	0.330973	0.00125987
A_33_P3263747	0.315675	8.49e-05				MPP1	0.326822	0.014272
lincRNA:chr2:120443455-120452280_F	0.31564	8.51e-05				STK4	0.326362	0.00980755
FLJ34208	0.314781	3.38e-05				LOC100507429	0.323551	0.008696
lincRNA:chr2:201638597-201642676_R	0.313157	0.000743941				PPP3CC	0.320883	0.00879124
A_33_P3247210	0.311566	0.00290441				TNFRSF10B	0.319884	0.0408054
lincRNA:chr6:6683526-6811251_R	0.308894	0.000226064				ZNF831	0.319177	0.00977207
LILRA1	0.308445	0.000240103				SGTB	0.316557	0.0397932
lincRNA:chr21:15443204-15457462_R	0.307111	0.000271444				CD53	0.314583	0.0231157
USP48	0.305275	0.0213338				FAM65B	0.312778	0.000685636
LOC439951	0.305026	0.0010296				FLI1	0.311673	0.0197787
lincRNA:chr7:30216750-30313150_F	0.302398	0.00687082				PTGER4	0.311473	0.0396571
HAP1	0.301324	0.0021876				TREX1	0.309632	0.0118213
THC2573121	0.299743	0.000705801				TRAFD1	0.308444	0.0238968
A_33_P3316691	0.29947	0.00267716				LEPROTL1	0.308079	0.0129243
XLOC_l2_001196	0.297995	0.00358124				SERPINB9	0.305987	0.00901399
SERPINA6	0.29733	0.048728				OAZ1	0.301188	0.00405053
lincRNA:chr13:113549599-113574924_R	0.295829	0.00067025				GPR18	0.300373	0.00125987
lincRNA:chr2:43148721-43166396_F	0.295708	0.000271759				GBP3	0.299745	0.00561449
XM_003118986	0.29564	0.0161044				RNASEH2B	0.297958	0.00622554
lincRNA:chr8:22847955-22856530_F	0.295599	0.000723355				CD5	0.297872	0.00156561
lincRNA:chr12:9480083-9506383_R	0.294987	0.00277494				RNF19A	0.291442	0.0231157
lincRNA:chr13:74245699-74258424_R	0.294392	0.00337118				UBR1	0.286441	0.0164085
LY96	0.294384	0.0468488				NECAP2	0.28562	0.003976
lincRNA:chr2:216473880-216713730_R	0.293473	0.0352313				CCNDBP1	0.283893	0.0168105
lincRNA:chr1:223185802-223197477_F	0.291824	0.00124748				AHR	0.260724	0.049179
lincRNA:chr8:105607224-105688174_R	0.291592	0.000234701				AK091525	0.25577	0.018269
Q29HP5	0.288906	0.00188629				BANK1	0.254594	0.0301848
SMCR2	0.28813	0.000788884				PPP1R18	0.254018	0.047698
lincRNA:chr21:36128280-36139780_F	0.28682	0.000705801				ANKRD22	0.247388	0.0342537
SLC25A45	0.286585	0.00442685				XRN1	0.247302	0.0312687
lincRNA:chr17:70417969-70419213_R	0.286344	0.000898036				MICB	0.246625	0.0233006
FLJ40434	0.284958	0.0040707				CD96	0.235811	0.0223019
A_33_P3333677	0.28481	0.00019992				TLR3	0.225861	0.000706702
lincRNA:chr8:90615284-90628709_F	0.284524	5.21e-05				GAB3	0.220225	0.000900197
THC2606816	0.28438	0.00143239				SPPL2A	0.219415	0.0460562
TNFRSF13C	0.28202	0.00295901				RFFL	0.218005	0.0236773
MRPS31	0.281697	0.0496545				GLCCI1	0.216553	0.0231078
lincRNA:chrX:57001900-57013275_R	0.281338	0.000205103				NUB1	0.212939	0.0447463
ENST00000433071	0.280686	0.00143239				BTLA	0.205994	0.0261749
lincRNA:chr22:27067640-27070585_R	0.279791	0.000705801				LINC00324	0.205991	0.0160275
lincRNA:chr8:143274368-143286859_F	0.279081	0.000518454				STAT5B	0.205538	0.0304118
lincRNA:chr11:65068424-65079274_R	0.279076	0.00209384				CXCL10	0.19651	0.00932846
NEGR1	0.278803	0.0205326				STYK1	0.193194	0.0367024
LOC100129648	0.278749	1.6e-06				RTKN2	0.192685	0.0154264
lincRNA:chr6:44006347-44033347_R	0.276922	0.0314629				SP110	0.18696	0.0183706
AK022213	0.275639	0.000500739				ITGA4	0.185564	0.00357936
XLOC_009868	0.274832	0.0175334				HERC1	0.170711	0.0106782
AMPD1	0.274736	0.0421959				ITGAL	0.170158	0.0322825
RAB11FIP4	0.272838	0.00874914				CTSW	0.165305	0.0299565
lincRNA:chr8:142273943-142310368_F	0.272784	0.0109918				RASSF5	0.164931	0.0144961
lincRNA:chr20:25213650-25221750_R	0.272431	0.000529355				CYLD	0.161554	0.0474691
DNAL4	0.272223	0.00530354				KAT2B	0.138947	0.00949128
THC2485300	0.271966	0.000666522				GBP1P1	0.117178	0.0433568
ARHGEF7	0.271638	0.00106182				CD48	0.0809949	0.0233006
A_33_P3414228	0.271575	0.00155096				lincRNA:chr8:107282463-107284434_F	-0.0868121	0.0197676
lincRNA:chr1:145689868-145694918_R	0.27108	0.00371059				GPR32	-0.09654	0.00748565
lincRNA:chr6:138961057-139020207_F	0.270124	0.0180259				lincRNA:chr11:72855977-72913777_R	-0.11245	0.0478382
MOP-1	0.269955	0.0229722				TNKS	-0.115857	0.0223381
A_33_P3291329	0.269913	0.0126826				TTLL11	-0.118684	0.017779
A_33_P3388883	0.26802	0.00190516				FAM114A1	-0.133262	0.0296746
TRIM78P	0.267712	0.00125296				lincRNA:chr10:131977935-131987135_F	-0.138336	0.0290818
TBC1D3	0.26675	0.0149675				lincRNA:chr1:85933672-85934049_R	-0.140916	0.0075644
HPX-2	0.265323	0.0301661				A_33_P3362548	-0.146058	0.0459217
lincRNA:chr3:136738660-136787685_F	0.264118	0.000466732				SPIN1	-0.150586	0.0401788
lincRNA:chr15:69951596-69988646_R	0.263361	0.00166828				lincRNA:chr7:105551628-105553084_F	-0.160042	0.00929325
lincRNA:chr9:36419075-36431725_F	0.262494	0.029164				TTC3	-0.172885	0.0231696
lincRNA:chr10:80112419-80123044_F	0.262203	0.0255581				RAI14	-0.189181	0.018269
PRDM4	0.261018	0.00260948				ZNF782	-0.208115	0.0173105
lincRNA:chr5:61931044-61948469_F	0.260638	0.00185544				lincRNA:chr6:3708951-3719951_R	-0.214788	0.00613494
lincRNA:chr15:38364787-38365169_F	0.260251	0.00172424				ARHGEF7	-0.221049	0.0250919
lincRNA:chr5:134465126-134478076_R	0.258971	0.00416024				C3orf75	-0.224835	0.043342
ENST00000390606	0.258248	0.000177631				IL17RD	-0.224958	0.0224733
A_33_P3274080	0.258018	0.00227751				GTF2IRD1	-0.230334	0.0436311
LOC100130463	0.257899	0.00499488				MFAP2	-0.232331	0.00234369
FNDC3A	0.257355	0.00535442				PTGER3	-0.235366	0.00760808
CD72	0.255986	0.0344831				WASL	-0.245496	0.0273565
lincRNA:chr20:47715043-47723493_R	0.255558	0.0252449				WASF1	-0.279086	0.0264791
CEACAM19	0.255334	0.00346014				KAT8	-0.282466	0.0140714
KRTAP4-12	0.255275	0.00530354				FHOD3	-0.29404	0.047698
EIF4G1	0.254638	0.0371704				lincRNA:chr12:54523008-54559358_R	-0.299039	0.0288632
lincRNA:chr12:54128308-54135158_F	0.252744	0.00215318				GLRX5	-0.300634	0.00274585
EVX1	0.251422	0.00129941				ARMCX2	-0.306124	0.0428419
BX648392	0.249811	0.00315926				ARHGEF37	-0.308212	0.0231137
lincRNA:chr18:60249120-60256770_R	0.249726	0.0311913				COQ7	-0.31574	0.0332789
NP1243929	0.249317	0.00741937				SORT1	-0.33795	0.0400305
C1orf229	0.248572	0.00506255				PPP1R13B	-0.339304	0.0466321
lincRNA:chr5:133837051-133848051_R	0.24787	0.0031753				RNF24	-0.342358	0.0479772
PLA2G4E	0.247491	0.0185877				OSBPL10	-0.346109	0.0247802
lincRNA:chr6:3999676-4018612_R	0.246568	0.0275997				THAP4	-0.36398	0.00138587
SUV39H1	0.246553	0.0193059				CYTH3	-0.373501	0.0277347
lincRNA:chr1:30142313-30152488_F	0.245603	0.0472655				FZD1	-0.374672	0.0157286
lincRNA:chr12:57775433-57820783_F	0.244793	0.00258585				FGFR2	-0.375523	0.0333598
ADARB2-AS1	0.244561	0.00261279				FERMT2	-0.386832	0.0260234
BX096650	0.244558	0.0182419				DPCD	-0.395028	0.0327735
lincRNA:chr7:33664500-33886275_R	0.244539	0.00155565				LGALSL	-0.396782	0.0373646
lincRNA:chr10:47041819-47063144_R	0.243575	0.000126815				PTGFRN	-0.40419	0.0326946
lincRNA:chr5:149866432-149882132_R	0.243327	0.0194544				TRIM45	-0.406166	0.0238217
lincRNA:chr8:27416133-27435295_R	0.242863	0.00380101				KIAA1217	-0.406757	0.0420677
lincRNA:chr5:141143016-141169841_R	0.242063	0.00687082				SIX5	-0.409317	0.0124702
MYOG	0.241278	0.00166536				BPHL	-0.409481	0.0478382
lincRNA:chr2:72150317-72161342_F	0.24095	0.0106289				CTSF	-0.410505	0.0457481
ENST00000462693	0.240802	0.0215416				ITGB5	-0.411603	0.0314326
AK124642	0.240259	0.00353202				FAM69B	-0.4153	0.0249624
SPACA3	0.239448	0.0103754				SMTN	-0.416737	0.0466321
AK123110	0.239085	0.0486142				FNBP1L	-0.417243	0.0352323
GHSR	0.23834	0.000163812				TRO	-0.420032	0.0124702
C9orf100	0.238127	0.0233771				ALDH7A1	-0.420133	0.018269
lincRNA:chr18:59236195-59282370_F	0.237146	0.0229722				ZCCHC14	-0.427859	0.00799736
A_33_P3321682	0.236338	0.00741937				GLI3	-0.434755	0.0460562
lincRNA:chr13:33868250-33874375_F	0.235275	0.0159456				FV367791	-0.445199	0.0236773
BE561442	0.235159	0.0150555				GPR125	-0.449736	0.00977207
LOC729305	0.234758	0.0207856				CMTM4	-0.456979	0.0454351
UTS2R	0.23449	0.00244822				MMP2	-0.465645	0.0352323
ADAM17	0.234435	0.0115955				CLEC11A	-0.466618	0.0190677
ARSF	0.234007	0.0209003				FAP	-0.470845	0.008696
LOC646743	0.232022	0.0149675				LEPREL4	-0.475567	0.0230797
lincRNA:chr6:3999676-4018493_R	0.230825	0.0207856				CHKA	-0.47859	0.0168105
LINC00277	0.229676	0.0128722				SNURF	-0.48242	0.0146555
AA593742	0.228736	0.000205818				TMEM98	-0.495981	0.0136965
lincRNA:chr5:131804581-131808735_F	0.228496	0.00203128				CERCAM	-0.497457	0.0197676
lincRNA:chr3:175987356-176039381_F	0.227789	0.00276552				TGFB1I1	-0.53515	0.0240691
DNAJB13	0.226922	0.0160192				AEBP1	-0.540744	0.0167419
XLOC_005849	0.225843	0.00491227				LONRF2	-0.541193	0.0288632
BC036215	0.224665	0.00293359				PARD3	-0.544646	0.0220646
XLOC_003462	0.223781	0.00468934				SPON2	-0.572273	0.047698
NPY2R	0.223085	1.67e-05				TMEM25	-0.588995	0.0336006
lincRNA:chr11:122009090-122080940_R	0.222377	0.0297836				EPCAM	-0.595012	0.0339413
SH3GL3	0.221507	0.0126299				THBS2	-0.598701	0.0275395
KCNQ3	0.221286	0.0174541				PXDN	-0.607636	0.00251639
A_33_P3271885	0.220073	0.0198159				KHDRBS3	-0.69183	0.010212
lincRNA:chr7:54850800-54872648_R	0.218184	0.00984863				SRPX2	-0.692417	0.000740523
OR4X2	0.217252	0.00310599				ZNF541	-0.69289	0.0184646
LENG8	0.215363	0.0472418				PNMAL1	-0.703234	0.0348066
LINC00494	0.215112	0.0472418				HILPDA	-0.717463	0.000265993
CDCP2	0.213035	0.00502603				SHANK2	-0.725387	0.00408392
lincRNA:chr2:105421343-105428293_F	0.212379	0.0150652				LEPREL2	-0.739411	0.000532479
lincRNA:chr2:8001249-8036724_F	0.209446	0.00121787				ENST00000372591	-0.772201	0.0257497
A_33_P3388527	0.209351	0.0199712				CNIH3	-0.784126	0.00583289
Q39472	0.207966	0.00209522				SYT7	-0.866317	0.0155581
lincRNA:chr2:152627254-152653328_R	0.206228	0.00227751				SPP1	-0.981228	0.0329396
lincRNA:chr11:38083599-38261799_R	0.206014	0.00530354				TET1	-1.07026	0.00143307
ENST00000434007	0.204836	0.036369
ENST00000359888	0.2034	0.00236093
A_33_P3257479	0.20317	0.00472184
OR4F15	0.202834	0.011865
lincRNA:chr10:114590927-114592210_F	0.202267	0.0172344
lincRNA:chr2:8710460-8717085_F	0.202248	0.00371899
lincRNA:chr3:15928546-15939996_F	0.201825	0.022552
A_33_P3210069	0.201313	0.00985926
FCRLA	0.200172	0.0196636
lincRNA:chr12:127650247-127665172_F	0.200138	0.00645484
CALML3	0.198907	0.0015793
LOC145845	0.198841	0.0205326
TRIM53P	0.197643	0.00558917
XLOC_009483	0.196609	0.00272338
lincRNA:chr6:125229601-125277876_R	0.194293	0.030733
lincRNA:chr18:33016877-33028102_R	0.193386	0.0402937
BJ995728	0.193032	0.00513274
lincRNA:chr4:6683199-6683665_R	0.192463	0.0301661
lincRNA:chr5:131806223-131811702_R	0.191553	0.00583228
DLG4	0.189385	0.0246992
lincRNA:chr1:156851776-156860276_R	0.189285	0.0175426
PSPN	0.188841	0.0189294
FRG2C	0.187489	0.0159985
lincRNA:chr11:70606952-70667252_F	0.186729	0.0189294
C10orf53	0.186266	0.00464744
lincRNA:chr8:103749649-103767499_R	0.186129	0.0161006
LOC100128591	0.185795	0.0382728
TUBB4A	0.185539	0.0166834
LOC284757	0.185356	0.0199339
ATP13A2	0.18493	0.036283
lincRNA:chr8:99929224-99951124_F	0.184639	0.0435049
lincRNA:chr8:127836493-128531243_R	0.184354	0.00685879
lincRNA:chrX:133675909-133683184_F	0.184284	0.0099332
ENST00000359838	0.183891	0.0158614
lincRNA:chr11:75122727-75130002_R	0.18192	0.0496545
lincRNA:chr7:55030831-55040930_R	0.180953	0.0238798
lincRNA:chr14:69273097-69292047_F	0.180489	0.0193832
lincRNA:chr4:104263901-104301551_F	0.180425	0.028904
lincRNA:chr2:232366756-232372381_F	0.177584	0.0056908
lincRNA:chr3:50266021-50271246_R	0.176617	0.0120694
LOC100131551	0.176616	0.0208863
SEZ6	0.176326	0.00345813
lincRNA:chr4:16239177-16275952_R	0.175717	0.00101643
LOC642947	0.175445	0.0488174
DCTN1	0.17418	0.0379113
lincRNA:chr2:218595605-218618480_F	0.171982	0.039261
lincRNA:chr11:61685224-61691249_F	0.171565	0.000674491
XLOC_002473	0.169437	0.0439491
SNORA71C	0.168473	0.0106289
DCAF6	0.168291	0.0207701
lincRNA:chr14:32398493-32399352_F	0.167525	0.0290673
lincRNA:chr9:123606154-123611279_F	0.167492	0.00847907
lincRNA:chrX:138994509-138999734_F	0.167101	0.00996016
lincRNA:chr2:218834305-218867070_R	0.165625	0.0123714
lincRNA:chr5:77285769-77295769_F	0.164498	0.0341649
LOC148696	0.164337	0.0449461
ENST00000425471	0.160535	0.0245985
A_33_P3245133	0.159765	0.0118254
CENPC1	0.159047	0.0409669
lincRNA:chr5:60464943-60477543_F	0.158069	0.0228376
OR4C15	0.157502	0.00147118
SCAMP4	0.157186	0.00501984
lincRNA:chr21:44919572-44938621_R	0.157022	0.0259066
lincRNA:chr3:128268891-128271202_F	0.156844	0.0467663
lincRNA:chr8:130695693-130741043_F	0.156758	0.00162965
A_33_P3381762	0.156545	0.0467663
lincRNA:chr8:58126971-58142821_R	0.155254	0.0454659
lincRNA:chr16:50304099-50310474_F	0.153579	0.0409669
AK001094	0.153507	0.0113666
TTC16	0.153005	0.0477472
lincRNA:chr4:90365352-90484827_F	0.151283	0.0192088
THC2588995	0.145664	0.0430227
lincRNA:chr8:107055124-107072278_F	0.144605	0.0118254
PIP5K1B	0.143201	0.0427691
A_33_P3292126	0.13729	0.030733
TTTY13	0.133555	0.0204731
lincRNA:chr11:29331349-29342299_R	0.132774	0.0149769
SLC34A1	0.132743	0.00741937
lincRNA:chr9:33011575-33024725_F	0.131112	0.0429391
lincRNA:chr7:105551628-105553084_F	0.129053	0.047228
XPC	0.128145	0.028331
lincRNA:chr18:48872618-49058541_F	0.126109	0.0206987
lincRNA:chr8:128976068-129037395_R	0.126081	0.0167492
lincRNA:chr1:101518537-101561912_R	0.125502	0.0246324
lincRNA:chr8:124456094-124469294_F	0.124072	0.00145578
lincRNA:chr3:136790035-136808485_R	0.119521	0.0271191
KRTAP23-1	0.117512	0.0341304
SLC13A2	0.11593	0.0373713
lincRNA:chr15:79641195-79678020_F	0.114357	0.0467663
H2AFB2	0.110543	0.0451544
HEPACAM	0.105053	0.0118254
TTLL11	0.101788	0.0467663
CHST5	0.098108	0.0341304
SLC38A8	0.095764	0.0192088
PDCD1LG2	0.0816576	0.0330682
X56665	0.0789174	0.0451544
HPX	0.0765747	0.039376
CRKL	-0.0708711	0.0343768
A_33_P3253857	-0.0901962	0.029164
SLC22A4	-0.110055	0.0346587
LOC100130887	-0.121437	0.0415475
CD46	-0.164917	0.017785
C1orf112	-0.243277	0.00944746
ATP2B4	-0.287487	0.0165994
SNHG6	-0.322936	0.0353572
CATSPER1	-0.323582	0.0422315
lincRNA:chr8:67834170-67838228_F	-0.419228	0.00205142
BBOX1	-0.423295	0.0443828
ORM2	-0.754407	0.0459648
Supplemental table 3: List of differentially expressed genes for each axis
Lists of differentially expressed genes for each modules as well as the FDR adjust p-values, and Log fold change between low and high patients.

## Sheet: Supplemental table 4
Stromal Axis	Representative Significant Pathways from Ingenuity Pathway Analysis	Representative Genes	Axis
	cell viability of B lymphocytes, quantity of B lymphocytes, differentiation of B lymphocytes, maturation of B lymphocytes	CD79A, POU2AF1, PDK1, PRDM1, TNFRSF13C, TNFRSF17, CD38, CD72, IGHM, IGLL1	B-cells (B)
		KRT6B, KRT23, Metallotheionins	Invasive Epithelial Cells (E)
	quantity of T lymphocytes, T cell development, activation of T lymphocytes, cytotoxicity of leukocytes	CD2, CD3D, IL-2Rα IL-2Rβ, IL-2Rγ, CD4, CD8A, CD8B, GZMBA, GZMB, GZMK, GZMH, STAT1, STAT4, TNFAIP2, TNFAIP8	T-cells (T)
	Hepatic Fibrosis / Hepatic Stellate Cell Activation, Adhesion of connective tissue cells	COL1A1, COL1A2, COL3A1, COL5A1, COL5A2, COL8A1, COL8A2, COL10A1, COL12A1, COL16A1, PDGFRB, FAP, P4HA2, MMP2, LOXL1	Desmoplastic stroma (D)
Supplemental Table 4: Representative pathways and genes used to label the stromal axes

## Sheet: Supplemental table 5
T stromal axis	Whole tumor low	Whole tumor Intermediate	Whole tumor high	Kappa test p-value
LCM low	17	1	0	1.344e-10
LCM intermediate	5	4	4
LCM high	0	2	21
B stromal axis	Whole tumor low	Whole tumor Intermediate	Whole tumor high	Kappa test p-value
LCM low	9	9	3	0.00953854
LCM intermediate	5	5	2
LCM high	0	10	11
E stromal axis	Whole tumor low	Whole tumor Intermediate	Whole tumor high	Kappa test p-value
LCM low	6	3	0	2.88126e-10
LCM intermediate	5	22	2
LCM high	0	1	15
D stromal axis	Whole tumor low	Whole tumor Intermediate	Whole tumor high	Kappa test p-value
LCM low	9	1	1	5.88878e-05
LCM intermediate	14	8	8
LCM high	1	1	11
Supplemental Table 5: Agreement between classifications in LCM dataset and matched bulk expression profiles.

## Sheet: Supplemental table 6
Stromal Axis Score	Number of patients	Fraction
T high	460	0.418944
T intermediate	168	0.153005
T low	470	0.428051
B high	260	0.236794
B intermediate	620	0.564663
B low	218	0.198543
E high	239	0.217668
E intermediate	675	0.614754
E low	184	0.167577
D high	444	0.404372
D intermediate	206	0.187614
D low	448	0.408015
Supplemental Table 6: Observed frequencies of the states for each stromal axis score across the whole cohort of TNBC patients (n=1,098).

## Sheet: Supplemental table 7
Subtype	Predicted frequencies	Predicted numbers (rounded)	Observed numbers	p-value (enrichment)	p-value (depletion)	Enriched/Depleted
T-low,B-Intermediate,D-high,E-low	0.0163788	18	44	1.16e-07	1	Enriched
T-low,B-low,D-low,E-Intermediate	0.021317	23	44	7.65e-05	0.999962	Enriched
T-low,B-low,D-Intermediate,E-high	0.00347064	4	13	0.000166983	0.999956	Enriched
T-high,B-high,D-Intermediate,E-Intermediate	0.0114418	13	28	0.000106353	0.999956	Enriched
T-high,B-high,D-low,E-Intermediate	0.0248831	27	49	9.45e-05	0.99995	Enriched
T-low,B-low,D-low,E-high	0.00754781	8	21	0.000140421	0.999949	Enriched
T-low,B-low,D-high,E-low	0.00575898	6	15	0.00222086	0.999158	Enriched
T-high,B-high,D-high,E-low	0.00672237	7	16	0.00384807	0.998402	Enriched
T-high,B-high,D-low,E-low	0.00678294	7	16	0.00418377	0.998247	Enriched
T-high,B-high,D-high,E-Intermediate	0.0246609	27	42	0.00421512	0.997465	Enriched
T-low,B-low,D-Intermediate,E-Intermediate	0.00980203	11	20	0.00717947	0.996493	Enriched
T-low,B-low,D-high,E-high	0.00748042	8	16	0.0100723	0.995371	Enriched
T-Intermediate,B-Intermediate,D-high,E-Intermediate	0.0214772	24	36	0.00960203	0.994172	Enriched
T-high,B-high,D-low,E-high	0.00881044	10	17	0.0201397	0.989757	Enriched
T-high,B-Intermediate,D-low,E-high	0.0210095	23	33	0.0285495	0.981661	Enriched
T-high,B-high,D-Intermediate,E-high	0.00405123	4	8	0.0819712	0.962412
T-Intermediate,B-low,D-Intermediate,E-Intermediate	0.0035037	4	7	0.0949922	0.957747
T-low,B-low,D-high,E-Intermediate	0.0211267	23	31	0.0674926	0.954032
T-low,B-Intermediate,D-high,E-Intermediate	0.0600851	66	78	0.0742803	0.94122
T-high,B-high,D-Intermediate,E-low	0.00311894	3	6	0.132269	0.940663
T-Intermediate,B-Intermediate,D-Intermediate,E-low	0.00271629	3	5	0.181572	0.918111
T-Intermediate,B-Intermediate,D-low,E-high	0.00767304	8	12	0.144183	0.914351
T-high,B-Intermediate,D-low,E-Intermediate	0.0593365	65	75	0.117569	0.904802
T-high,B-high,D-high,E-high	0.00873178	10	13	0.170127	0.893604
T-Intermediate,B-Intermediate,D-high,E-low	0.00585454	6	9	0.199437	0.884084
T-Intermediate,B-low,D-low,E-Intermediate	0.00761971	8	11	0.221398	0.860655
T-high,B-Intermediate,D-Intermediate,E-high	0.00966063	11	13	0.268493	0.817278
T-high,B-low,D-low,E-high	0.00738722	8	10	0.296845	0.805416
T-Intermediate,B-Intermediate,D-Intermediate,E-high	0.00352823	4	5	0.346519	0.804802
T-Intermediate,B-high,D-high,E-high	0.003189	4	4	0.463868	0.725309
T-Intermediate,B-high,D-high,E-Intermediate	0.00900658	10	11	0.403041	0.70987
T-Intermediate,B-high,D-low,E-low	0.00247725	3	3	0.511483	0.709751
T-low,B-Intermediate,D-Intermediate,E-high	0.00987064	11	12	0.4013	0.706914
T-Intermediate,B-high,D-Intermediate,E-Intermediate	0.00417873	5	5	0.484791	0.687935
T-Intermediate,B-low,D-Intermediate,E-high	0.00124057	1	1	0.744106	0.604892
T-Intermediate,B-Intermediate,D-Intermediate,E-Intermediate	0.00996466	11	11	0.533639	0.586322
T-low,B-low,D-low,E-low	0.00581087	6	6	0.613926	0.545274
T-high,B-Intermediate,D-high,E-low	0.0160303	18	17	0.590149	0.505871
T-Intermediate,B-Intermediate,D-low,E-Intermediate	0.0216707	24	23	0.593741	0.488885
T-low,B-low,D-Intermediate,E-low	0.00267196	3	2	0.791149	0.437895
T-Intermediate,B-low,D-low,E-high	0.00269794	3	2	0.795561	0.431386
T-Intermediate,B-Intermediate,D-high,E-high	0.00760453	8	7	0.728456	0.404607
T-low,B-Intermediate,D-Intermediate,E-Intermediate	0.0278773	31	28	0.708935	0.358755
T-Intermediate,B-low,D-Intermediate,E-low	0.000955084	1	0	1	0.350224
T-Intermediate,B-low,D-high,E-low	0.00205853	2	1	0.89592	0.339814
T-Intermediate,B-low,D-low,E-low	0.00207707	2	1	0.898022	0.335035
T-high,B-Intermediate,D-Intermediate,E-Intermediate	0.0272842	30	27	0.733435	0.332923
T-Intermediate,B-high,D-Intermediate,E-low	0.00113909	1	0	1	0.286094
T-low,B-Intermediate,D-Intermediate,E-low	0.00759915	8	6	0.839295	0.272204
T-Intermediate,B-high,D-high,E-low	0.00245513	3	1	0.93273	0.249057
T-Intermediate,B-Intermediate,D-low,E-low	0.00590728	6	4	0.887911	0.224392
T-high,B-low,D-Intermediate,E-low	0.00261511	3	1	0.943592	0.2188
T-Intermediate,B-low,D-high,E-high	0.00267385	3	1	0.947125	0.208527
T-Intermediate,B-high,D-Intermediate,E-high	0.00147958	2	0	1	0.196758
T-low,B-Intermediate,D-low,E-Intermediate	0.0606264	67	59	0.846509	0.186642
T-high,B-Intermediate,D-low,E-low	0.0161747	18	13	0.900998	0.153136
T-low,B-high,D-high,E-high	0.0089216	10	6	0.925684	0.142384
T-low,B-high,D-Intermediate,E-low	0.00318674	3	1	0.969942	0.135568
T-Intermediate,B-high,D-low,E-high	0.00321773	4	1	0.970951	0.132014
T-Intermediate,B-high,D-low,E-Intermediate	0.00908772	10	6	0.932955	0.130362
T-high,B-low,D-Intermediate,E-high	0.0033968	4	1	0.976152	0.113099
T-low,B-Intermediate,D-low,E-high	0.0214662	24	17	0.935686	0.0987813
T-high,B-Intermediate,D-Intermediate,E-low	0.00743747	8	4	0.962636	0.0896803
T-low,B-Intermediate,D-low,E-low	0.0165263	18	11	0.972692	0.0500425
T-low,B-high,D-high,E-Intermediate	0.025197	28	17	0.988954	0.019502	Depleted
T-low,B-high,D-high,E-low	0.00686851	8	2	0.995558	0.0193325	Depleted
T-high,B-Intermediate,D-high,E-Intermediate	0.0588067	65	48	0.988458	0.0165256	Depleted
T-low,B-Intermediate,D-high,E-high	0.0212746	23	13	0.992898	0.0138911	Depleted
T-low,B-high,D-Intermediate,E-high	0.0041393	5	0	1	0.010521	Depleted
T-low,B-high,D-low,E-high	0.00900197	10	2	0.999465	0.00295724	Depleted
T-high,B-low,D-high,E-high	0.00732126	8	1	0.999687	0.00285051	Depleted
T-Intermediate,B-low,D-high,E-Intermediate	0.00755167	8	1	0.999757	0.00227151	Depleted
T-high,B-low,D-high,E-low	0.00563645	6	0	1	0.00201662	Depleted
T-high,B-Intermediate,D-high,E-high	0.0208219	23	10	0.999199	0.00197943	Depleted
T-high,B-low,D-low,E-low	0.00568723	6	0	1	0.00190666	Depleted
T-low,B-high,D-low,E-low	0.00693039	8	0	1	0.000482727	Depleted
T-high,B-low,D-Intermediate,E-Intermediate	0.00959348	11	1	0.999975	0.000294447	Depleted
T-high,B-low,D-low,E-Intermediate	0.0208635	23	7	0.999974	9.22e-05	Depleted
T-low,B-high,D-Intermediate,E-Intermediate	0.0116905	13	1	0.999998	3.45e-05	Depleted
T-high,B-low,D-high,E-Intermediate	0.0206772	23	4	1	1.56e-06	Depleted
T-low,B-high,D-low,E-Intermediate	0.025424	28	5	1	1e-07	Depleted
Supplemental Table 7: Enrichment and depletion of some stromal subtypes List of all stromal axis score-baed assignments as well as values entered for binomial test and resultant p-value. Significantly enriched and depleted patients (p < 0.05) are colored orange or green, respectively.
