# Supplementary material for: Identification of Interacting Stromal Axes in Triple-Negative Breast Cancer
Source: Oxford University Press journal article supplement (doi:10.1158/0008-5472.can-16-3427), 2017-06-26
Supplement: 00085472can163427-sup-176164_2_supp_4092730_1rkmf1.docx [file 00085472can163427-sup-176164_2_supp_4092730_1rkmf1.docx]

**Supplemental Materials and Methods**

**Laser capture microdissection (LCM) and gene expression profiling.**

Frozen sections embedded in Tissue-Tek O.C.T. compound (Sakura Finetek) were sectioned at 10 μm thickness, stained using the HistoGene kit (ThermoFisher), assessed by a practicing clinical pathologist with expertise in breast cancer (A.O.) and subjected to laser capture microdissection on an Arcturus PixCell IIe LCM system to isolate non-epithelial (stromal) compartments of the tumor bed as identified above. All microdissections were performed within three hours of tissue staining. Patient-matched adjacent histologically normal stromal tissue that was at least 2mm outside of the tumor margin was isolated for a subset of patient samples (n=11). Total RNA was extracted from each population of microdissected cells using the Arcturus PicoPure RNA Isolation Kit (ThermoFisher) Following extraction, total RNA yield and quality was assessed using an Agilent 2100 Bioanalyzer (Agilent Technologies). For samples exhibiting distinct 28S and 18S peaks, 100 pg to 5 ng of total RNA were then subjected to two rounds of T7 linear amplification using the Arcturus® RiboAmp® HS PLUS Kit and labeled with Cy3 dye (using the Arcturus® Cy3 Turbo Labeling™ Kit) according to the manufacturer’s protocol. Hybridizations were performed using a common reference design. The reference used for all arrays was Universal Human Reference RNA (Stratagene), subjected to two rounds of T7 linear amplification using the Arcturus® RiboAmp® HS PLUS Kit and labeled with Cy5 dye (Arcturus® Cy3 Turbo Labeling™ Kit) according to the manufacturer’s protocol. Prior to microarray hybridizations, amplified products were quantified using a spectrophotometer (NanoDrop) and subjected to BioAnalyzer assays for quality control. Agilent Technologies SurePrint G3 Human GE 8x60K Microarrays (Cat#G4851A) were used for all experiments. Amplified RNA (300 ng) was subjected to fragmentation followed by 17 h of hybridization, washing, and scanning on an Agilent G2505C scanner according to the manufacturer’s protocol (manual ID #G4140-90050). Cy3-labeled samples were hybridized against Cy5-labeled reference for all arrays. Microarray data were feature extracted using Agilent Feature Extraction Software (v. 10.7.3.1) with the default parameters. A full description of the patient and tumor characteristics of our cohort is presented in Supplemental Table 2.

**Microarray dataset normalization**

R/Bioconductor (vers 3.20; Bioconductor 3.1) *(47)* was used for most analyses. Normalization was performed using the limma package *(48)* where loess was applied for dye bias correction, and quantile normalization was used across arrays. Replicates of non-control probes were aggregated by taking their mean value. To investigate technical error introduced in the LCM/microarray procedure, the stromal and matched adjacent normal sample from a single patient were repeated and found to be highly concordant (>0.8). Replicate expression profiles were then averaged for the remainder of the analysis. The most variable probe was chosen when there were multiple probes for the same transcript.

**Confirming tissue specificity of the LCM-derived material**

We investigated if there was a difference between the normal and tumor-associated stromal gene expression profiles. Under the hypothesis that the profiles should harbour two distinct patterns of expression corresponding to the normal and tumor-associated stromal components, we selected the most variable genes across all samples (IQR > 2, n=282 genes) as our features for subsequent analysis using the Partitioning Around Medoids (pam) function from the *cluster* package in R [version 2.0.1]. PAM requires a distance measure (correlation distance was chosen) and a specification as to the number of clusters k. We selected k=2 as we expected all samples to fall into two clusters along a single dimension (i.e., normal samples vs tumor-associated samples). These two clusters intuitively correspond to the subset of genes that are more highly expressed in normal (versus tumor-associated) stromal samples and the subset of genes that are more highly expressed in tumor-associated (versus normal) samples. To linearly order the patient samples using this set of genes, we ranked samples based on the sum of expression of all the genes in the normal-enriched dataset, and the sum of expression of all genes in the tumor-associated-enriched dataset, after first negating these values. This method does not reweight genes and is thus an unbiased approach for ranking patients. We observed strong differences in expression of these highly variable genes (Wilcoxon test, p < 0.01), and that the normal stroma samples ordered separately from their tumor-associated counterparts (Supplemental figure 1).

**Differential Gene Expression and Pathway Analysis**

To identify differentially expressed (DE) genes for each stromal axis, we fitted a linear model comparing the levels for each stromal axis using the R package limma *(48)* and corrected with Benjamini-Hochberg (p < 0.05). DE genes lists were examined using QIAGEN’s Ingenuity® Pathway Analysis (IPA®, QIAGEN Redwood City, www.qiagen.com/ingenuity) and compared against the Molecular Signatures Database (MSigDB) for pathway analysis.

**Assignment of other subtyping schemes to patients across large patient cohort**

We used our compendium of 5,901 bulk expression profiles of invasive breast cancer samples from 13 non-overlapping datasets generated on different technologies *(5)*. We define poor outcome as an observed distant metastasis within 5 years of diagnosis (where available) and used ER and HER2 status as reported for each dataset where available. Since many datasets lacked information on PR status, we used ER and HER2 negativity to define TNBC patients. All patients within the compendium were also labeled with intrinsic subtype values via PAM50 *(49)*, and TNBC patients were labeled by TNBCType via the web-based tool *(50)*.

**Stromal axes can be accurately estimated in bulk expression profiles**

The limited size of our dataset precludes an investigation into which, if any, of the stromal axis scores are associated with clinical variables (e.g., tumor size, grade, stage), or outcome information. We note also that the TNBC-restricted focus of our patient cohort greatly reduces the observed variability for many of these variables. For example, although low-grade TNBC tumors do occur, their epidemiologic frequency is low. In order to explore associations between the stromal axis scores and these variables in larger TNBC cohorts, we required methodology to “translate” signatures of the four axes to bulk expression tissue. The ability to explore bulk expression datasets would also allow us to explore associations between the stromal axis scores and patient subtyping schemes such as TNBCType.

The approach leverages our previous effort to generate gene expression profile bulk tumor samples for 54 of the 57 TNBC patients studied here *(5)*. Using the list of differentially expressed genes obtained from contrasting high versus low patient samples in our microdissected stroma-specific data (per axis), we linearly ordered the matched patient samples in the bulk expression dataset. Then, the ROI95 procedure was used to delineate those regions in the order that correspond to patients with high, intermediate or low score for the axis. We observed statistically significant agreement between the two ternary classifications for all four axes (Kappa test, all p < 0.01; Figure 1d and Supplemental Table 5). When the two classifications disagree, the vast majority estimate an intermediate stromal profile as either a high or low bulk profile, or vice versa (T axis: 12/54, B axis: 26/54, E axis: 11/54, D axis: 24/54). Only five disagreements estimated a high profile in stroma to be low in bulk, or vice versa (B axis: 3/54, D axis: 2/54). Together this suggests that the underlying signals from these stromal processes are conserved and detectable in bulk expression profiles despite their predominantly epithelial content, and that the stromal axes can be applied to bulk expression datasets.

We then interrogated a large cohort of TNBC patient samples selected from a compendium of publicly available breast cancer datasets (n=1,098) *(5)* to investigate potential associations between the stromal axes and clinical, patient, and outcome information. The compendium comprises 13 individual, non-overlapping microarray datasets generated from (non-microdissected) bulk tumor material. Scores for each stromal axis were computed independently per dataset and pooled across the constituent datasets (Supplemental Table 6).

**Stromal axes are associated with clinical variables**

Stromal axis scores for the compendium were assessed for association with clinical variables. We observed that patients low for the T axis tend to have intermediate or low grade tumors (FET, p < 0.01); however, of the 369 T-low tumors only 24% are of intermediate or low grade. The ternary partitions of the D axis are associated with grades I-III, while the partitions of the E axis are strongly associated with lymph node status (both Kappa test, p < 0.01). Again, although there are significant associations here for the D and E axis scores with respect to grade and lymph node status, these are not one-to-one relationships. For example, of the 368 D-low tumors, only 92% are grade III.

**D axis-dependant univariate survival analysis**

To verify our observation that the D axis score controls the prognostic capacity of the B, T, and E axes, we performed univariate survival analyses of these three axes in D-high and D-low(/intermediate) patient cohorts. Patients were first stratified into D-high or D-low cohorts based on their D stromal axis score, and then univariate survival analysis for the B, T, and E axis scores was performed as before.

**Building prognostic predictors from stromal axes**

We have previously used Naive Bayes Classifiers (NBCs) to investigate the prognostic capacity of 122 signatures and showed that a subset of these were prognostic in TNBC patients. NBCs may have an advantage over the linear ordering by ROI95 as they allow weighting of genes to better reflect an association with prognosis. To determine if the stromal axes could perform as prognostic predictors in addition to being classification predictors, we trained an NBC for each stromal axis to predict prognosis. The NBCs were trained under leave-one-out cross-validation for the four stromal axes in the TNBC patient cohort within four individual datasets of the compendium for which there were sufficient numbers of event (distant metastasis within 5 years; poor-outcome) and event-free (good-outcome) individuals.

**Supplemental Figure 1:** Laser capture microdissection (LCM) successfully isolates normal vs. tumor-associated stromal compartments.

Separation of the most variable genes (IQR > 2) unbiasedly into two opposing directions using the Partitioning Around Medoids (pam) function and subsequent ranksum ordering of gene expression profiles distinguishes normal from tumor-associated stromal samples. Light and dark blue tissue types represent adjacent normal stroma and tumor stroma, respectively. Rows represent transcripts and columns represent stromal samples. Values are centered and scaled per transcript across all samples and represented by the color key. Patients with the smallest sum of expression are ranked lowest (right) and those with the largest sum are ranked highest (left).

**Supplemental Figure 2:** Identifying differentially expressed genes based on stroma-defined axes. Using the assignments from Figure 1b, we fitted a linear model using limma to find differentially expressed genes (FDR adjusted p-value < 0.05) between the low and high patients for each cluster. In the heatmaps, rows represent differentially expressed transcripts and columns represent patients. Values correspond to the color key and are scaled per transcript across all patients. Patients are ordered by their ranksum ordering of the differentially expressed gene list.

**Supplemental Figure 3:** Survival curves for T, B, and E axis scores when first stratified by D axis score.

Survival curves across the whole TNBC cohort for the T, B, and E axis scores when patients are first stratified by the D axis score into D-high (A), and D-low (B) groups.

**Supplemental Figure 4:** Survival curves for T, B, and E axis scores among patients not treated with chemotherapy when first stratified by D axis score. Survival curves across the whole TNBC cohort for the T, B, and E axis scores when patients are first stratified by the D axis score into D-high (A), and D-low (B) groups.

**Supplemental Figure 5:** Survival curves for T, B, and E axis scores among patients treated with chemotherapy when first stratified by D axis score. Survival curves across the whole TNBC cohort for the T, B, and E axis scores when patients are first stratified by the D axis score into D-high (A), and D-low (B) groups.

**Supplemental Figure 6:** Full heatmap depicting the subtype-specific performance of predictors. Colors are proportional to the rank of the classifier within the specific patient cohort, with red representing the highest- performing classifiers relative to the remaining classifiers. Ticks represent the level of significance of the classifier (log-rank test, p < 0.05, 0.01, 0.001, respectively). Stromal axis-based classifiers and the closest adjacent signatures have been highlighted.

**Supplemental Figure 7:** Naive Bayes classifier predictions agree with ROI95 assignments

Representative heatmaps using the discovery cohort of the METABRIC dataset depict the strong association of the posterior p-value returned by the NBC with stromal axis scores assigned by ROI95.
